# Supplementary material for: Functional single-walled carbon nanotubes ‘CAR’ for targeting dopamine delivery into the brain of parkinsonian mice
Source: Royal Society of Chemistry journal article supplement (doi:10.1039/c7nr02682j), 2017-01-01
Supplement: c7nr02682j1.pdf [file c7nr02682j1.pdf]

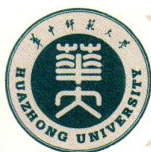

华中师范大学 生命科学学院  
COLLEGE OF LIFE SCIENCE, HUAZHONG NORMAL UNIVERSITY

## 项目伦理学批准书

项目名称：PM2.5 和甲醛复合暴露致小鼠哮喘样病变分子机制的研究

华中师范大学项目负责人：杨旭 医学博士，教授

根据国家自然科学基金项目“PM2.5 和甲醛复合暴露致小鼠哮喘样病变分子机制的研究”的课题任务书（21577045），华中师范大学生命科学伦理审查委员会实验动物护理和使用分委会批准了你们实验室于 2015 年 12 月 20 日的申请。批准你们使用 600 只大鼠和 800 只小鼠用于相关的科学实验。在使用实验动物时，请保持良好的实验环境，尊重实验动物的生命。伦理学批准书编号：CCNU-IACUC-2016-003，有效期为五年。

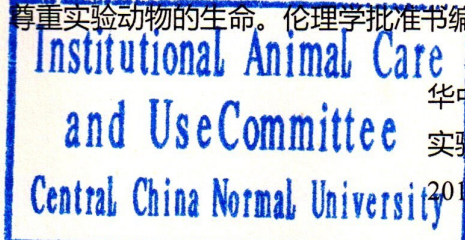

华中师范大学

实验动物护理和使用分委会

2016 年 1 月 24 日

## Project Ethics Ratification

January 24, 2016

Title of Project: Molecular Mechanisms of Asthma-like Pathology in Mice Induced by PM2.5 and Formaldehyde Combined Exposure

PI Name of Central China Normal University: Xu Yang, MD, Professor

According to the task document approved by National Natural Science Foundation of China for your project Molecular Mechanisms of Asthma-like Pathology in Mice Induced by PM2.5 and Formaldehyde Combined Exposure (ID: 21577045), the Institutional Animal Care and Use Committee, Ethics Review Committee for Life Science Study of Central China Normal University has reviewed and approved your application on January 24, 2016. 600 rats and 800 mice were approved to use in the relevant scientific experiments. Please take care of the animals' living in good condition and keep respect to their lives when you undertake these animal experiments. The Project Ethics Ratification ID is CCNU-IACUC-2016-003, valid for five years.

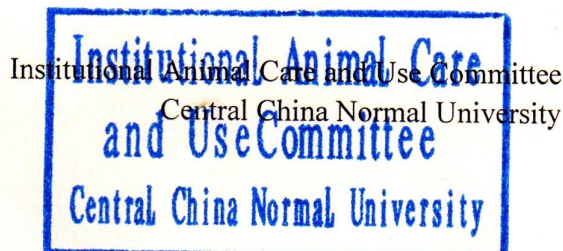

地址：武汉市洪山区珞瑜路152号

邮编：430079

Add: 152 Luoyu Avenue, Wuhan, P. R. China Zip code: 430079
